# Supplementary figures and images for: Ribosome subunit attrition and activation of the p53–MDM4 axis dominate the response of MLL-rearranged cancer cells to WDR5 WIN site inhibition
Source: PubMed Central journal article supplement — bioRxiv. 2024 Jan 10:2023.07.26.550648. Originally published 2023 Jul 29. Preprint. [Version 2] doi: 10.1101/2023.07.26.550648 (PMC10402127; doi:10.1101/2023.07.26.550648), 2024-01-10

**Figure 4—source data 3**

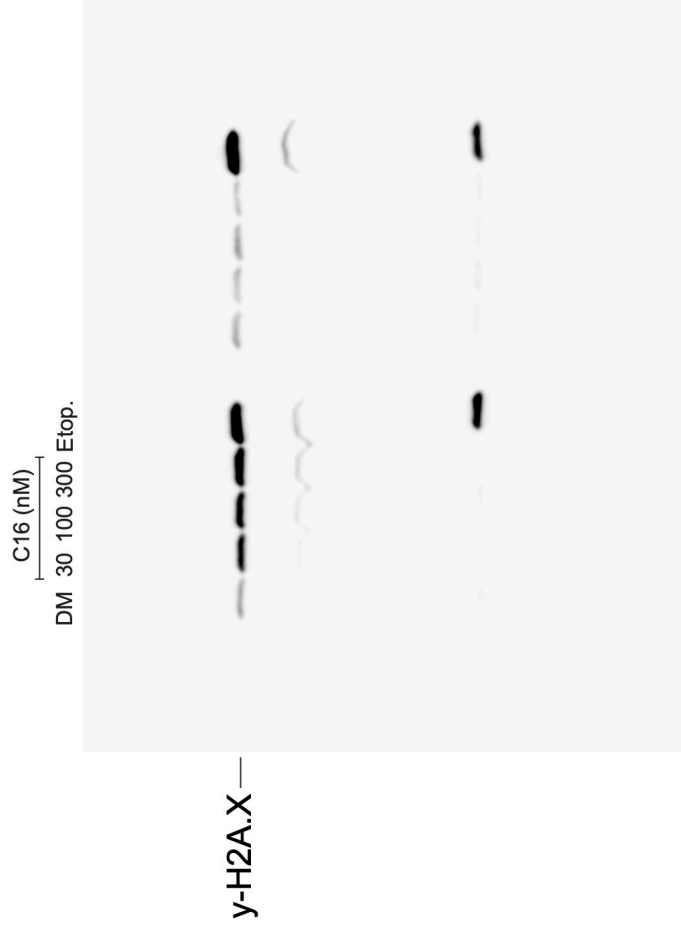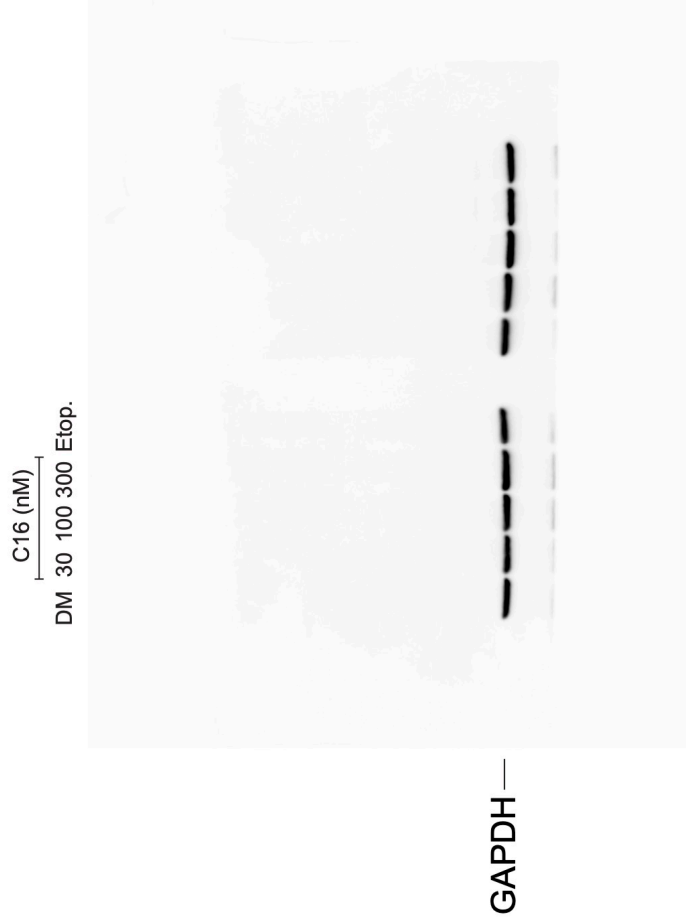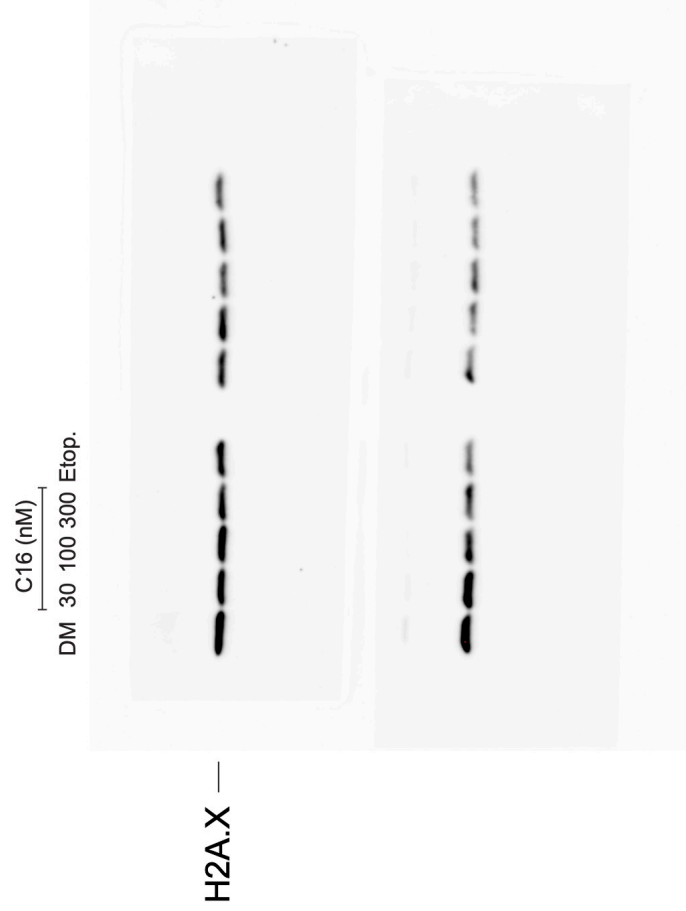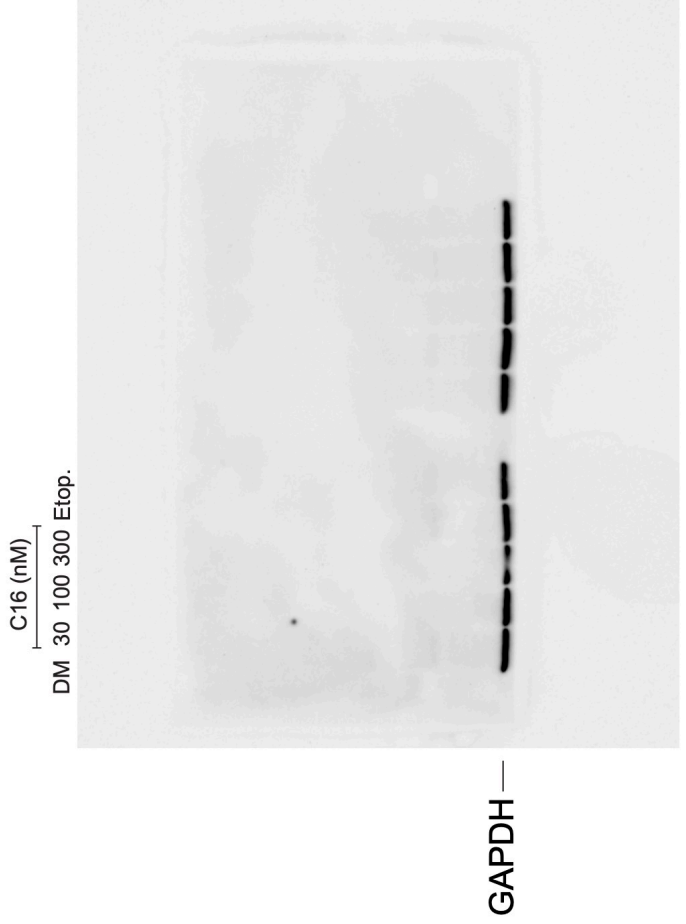

Supplement: media-10.pdf [file media-10.pdf]

**Figure 6—source data 1**

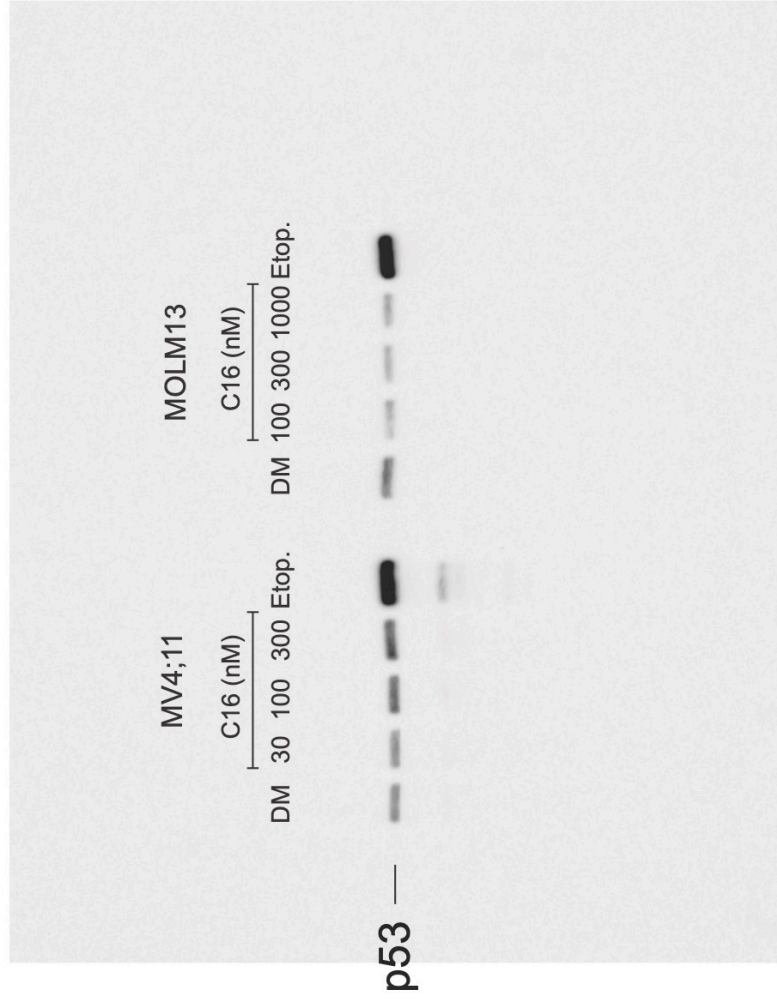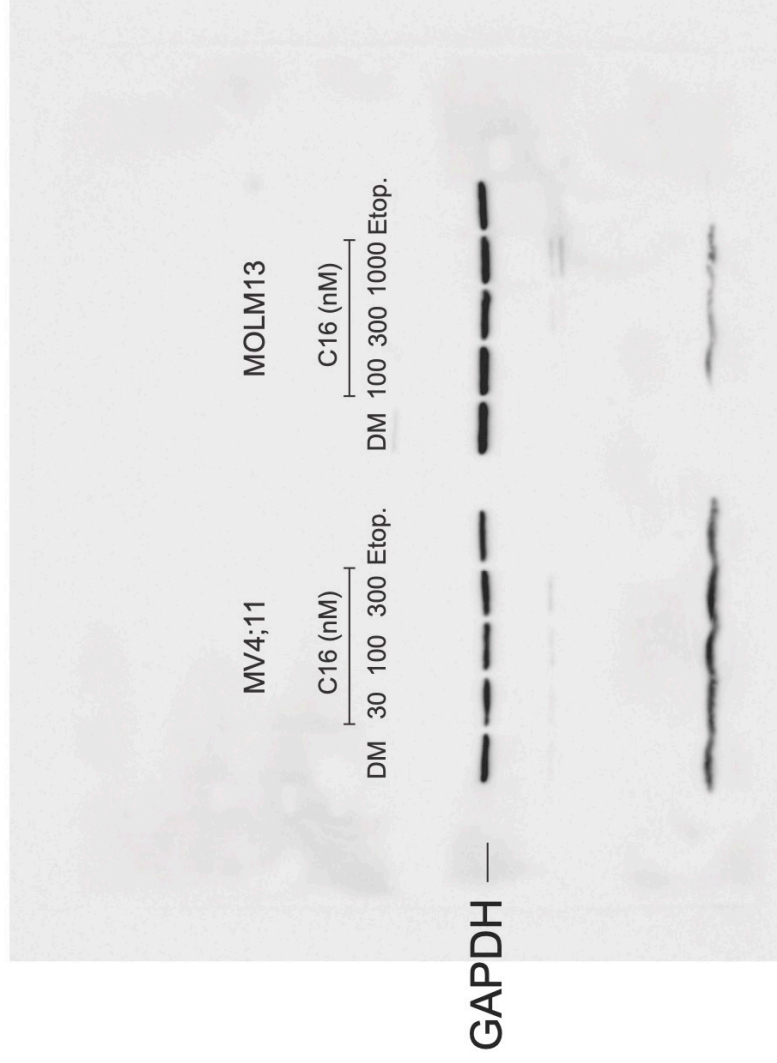

Supplement: media-14.pdf [file media-14.pdf]

Figure 6—source data 3

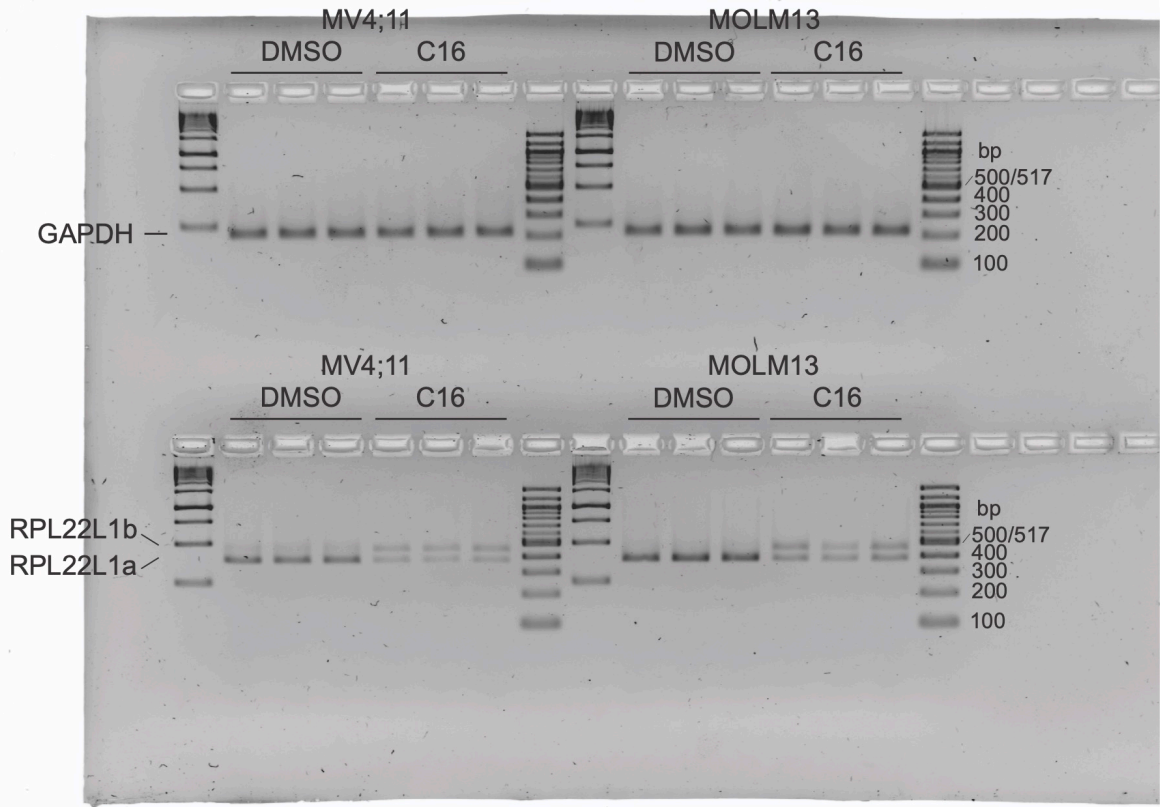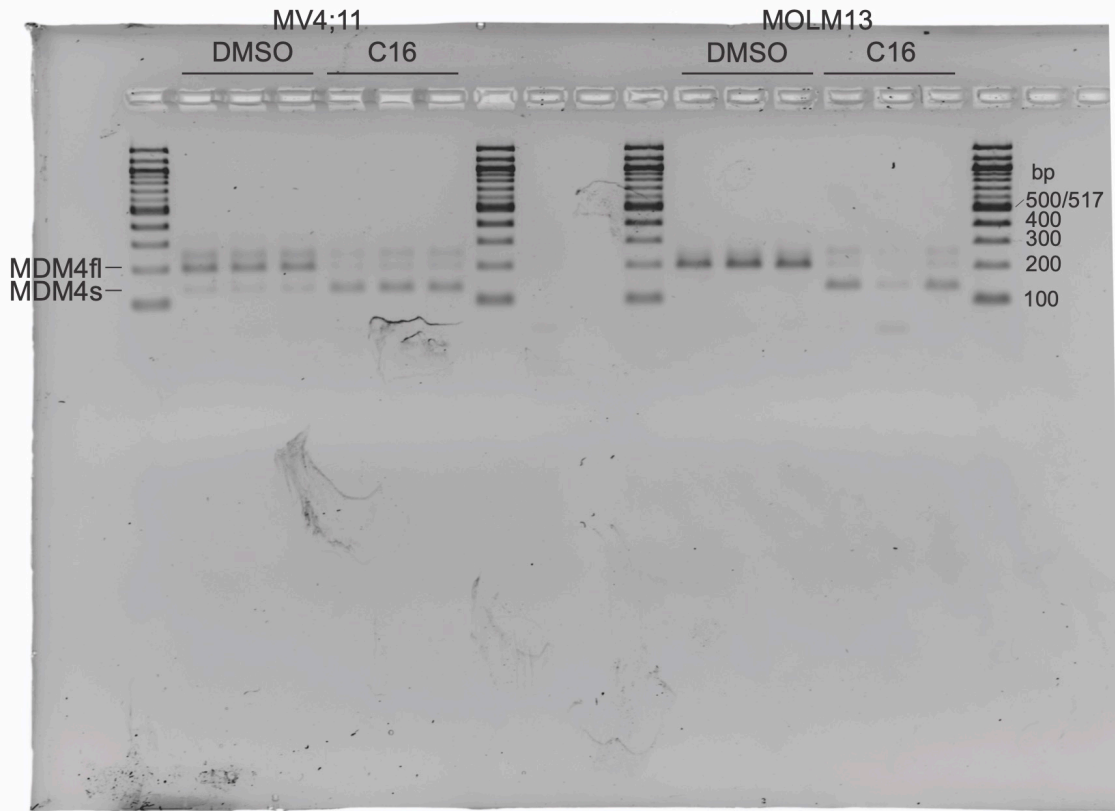

Supplement: media-16.pdf [file media-16.pdf]

Figure 6—source data 4

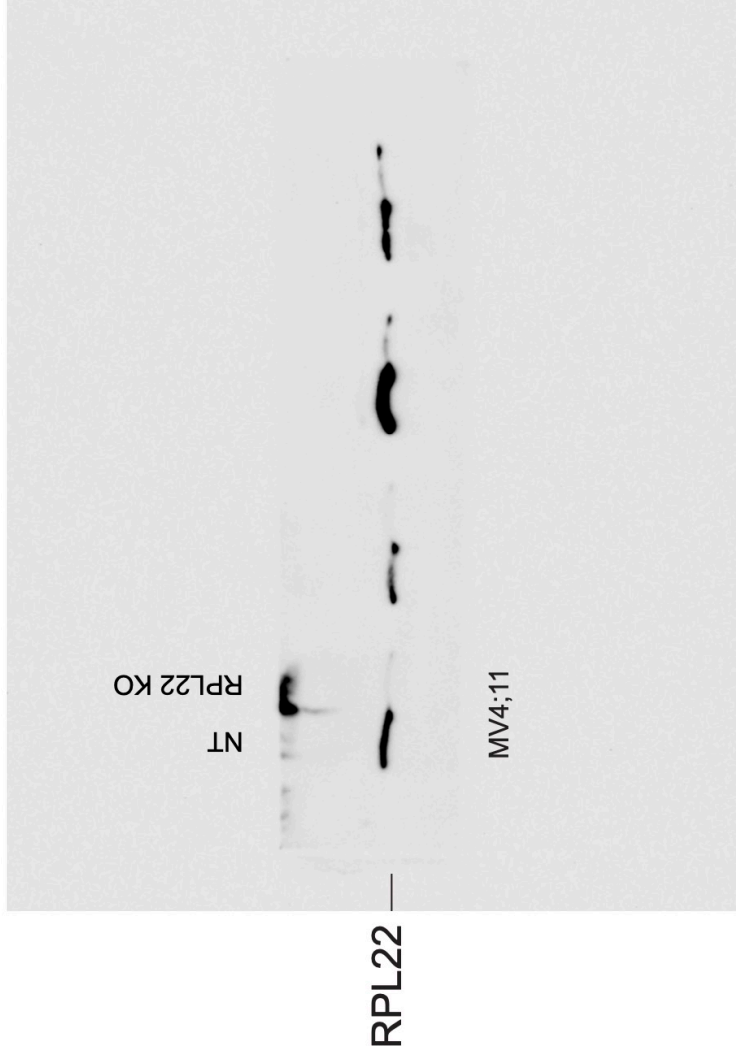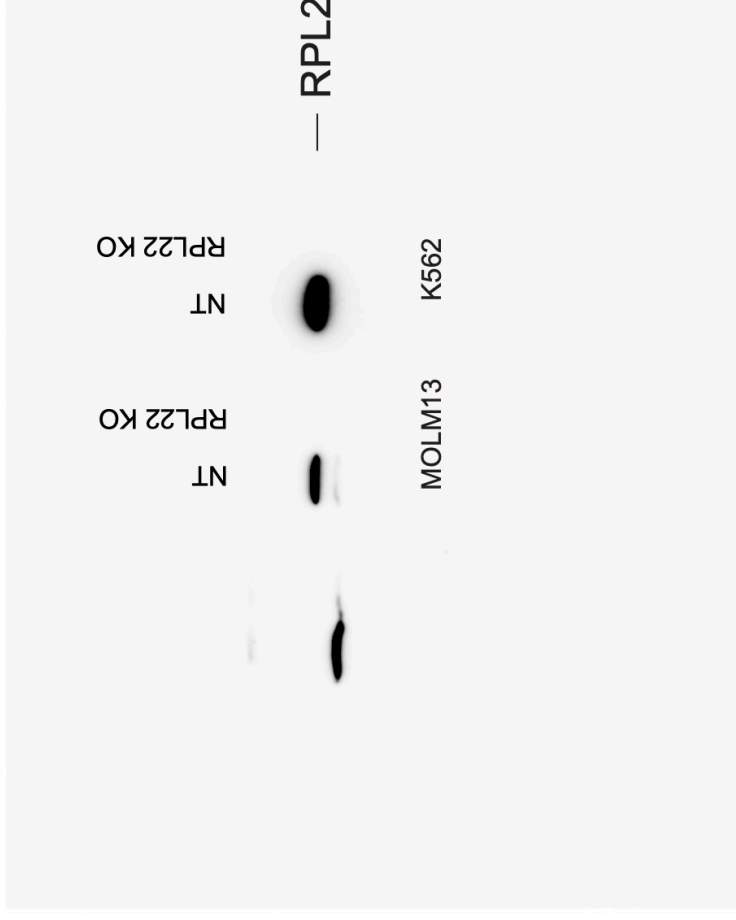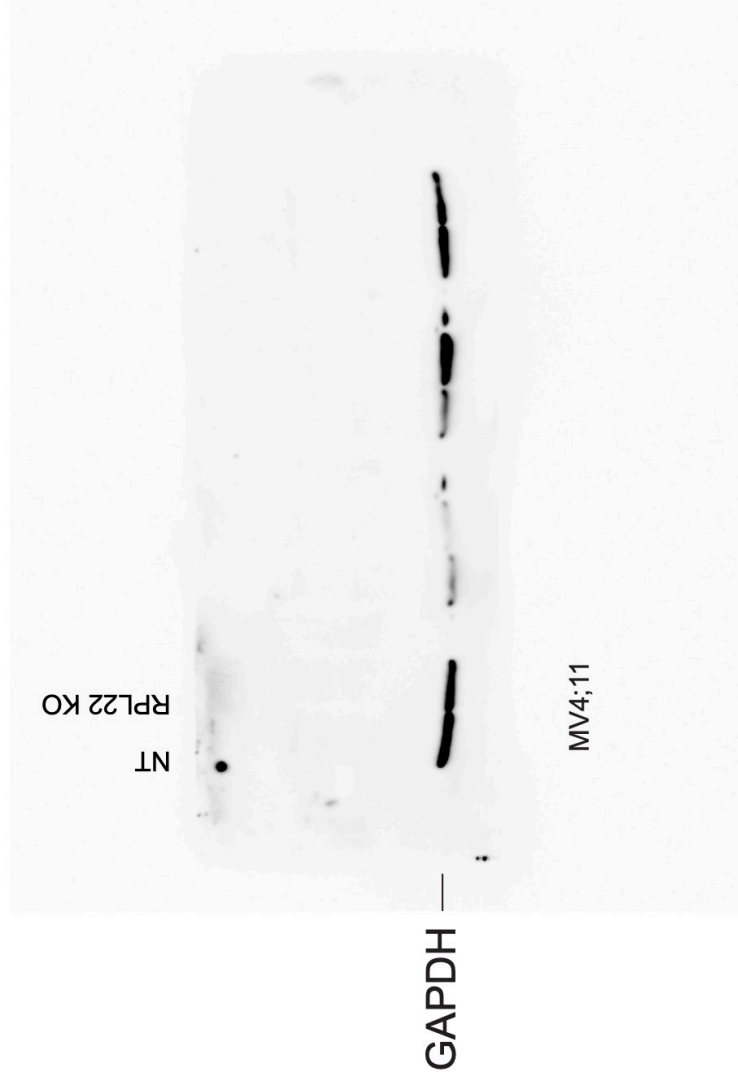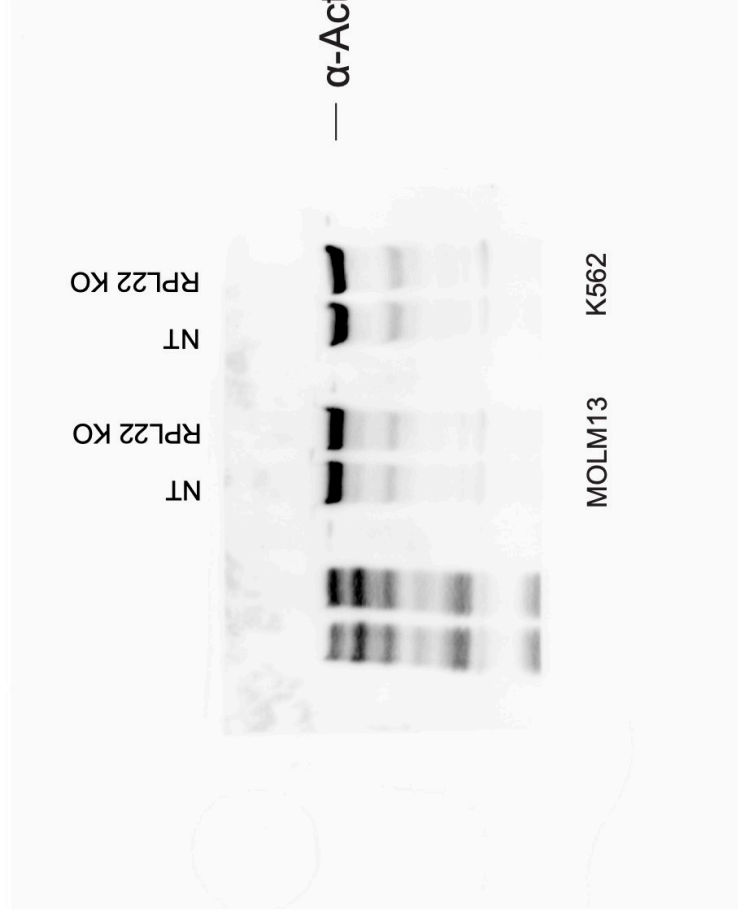

Supplement: media-17.pdf [file media-17.pdf]

**Figure 6—source data 5**

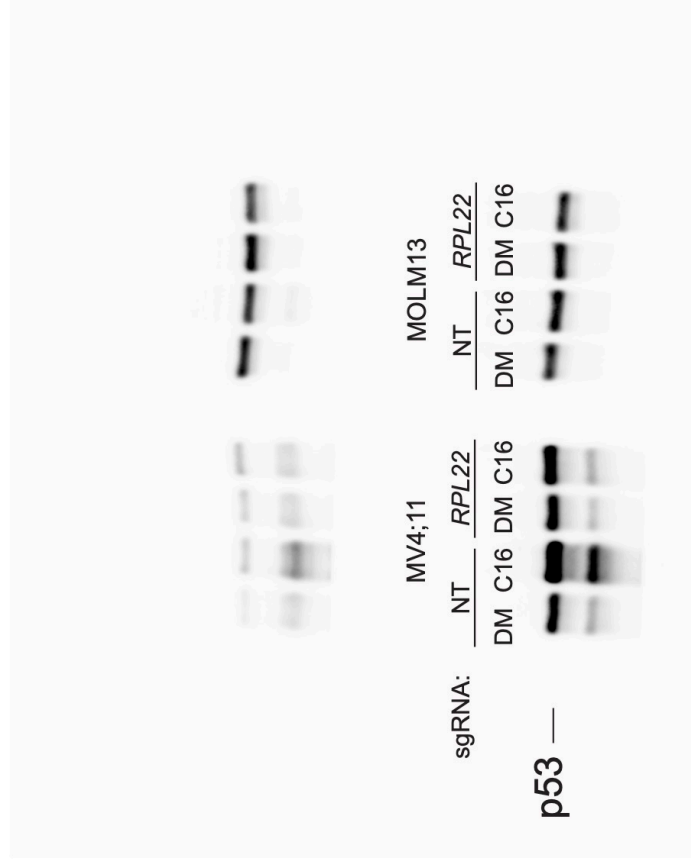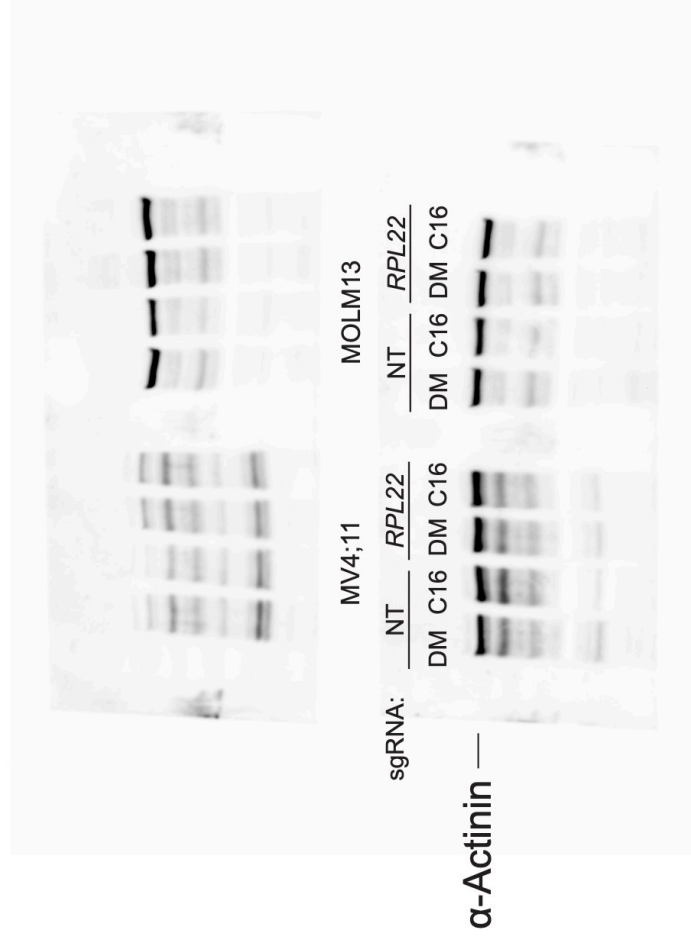

Supplement: media-18.pdf [file media-18.pdf]

Figure 6—source data 9

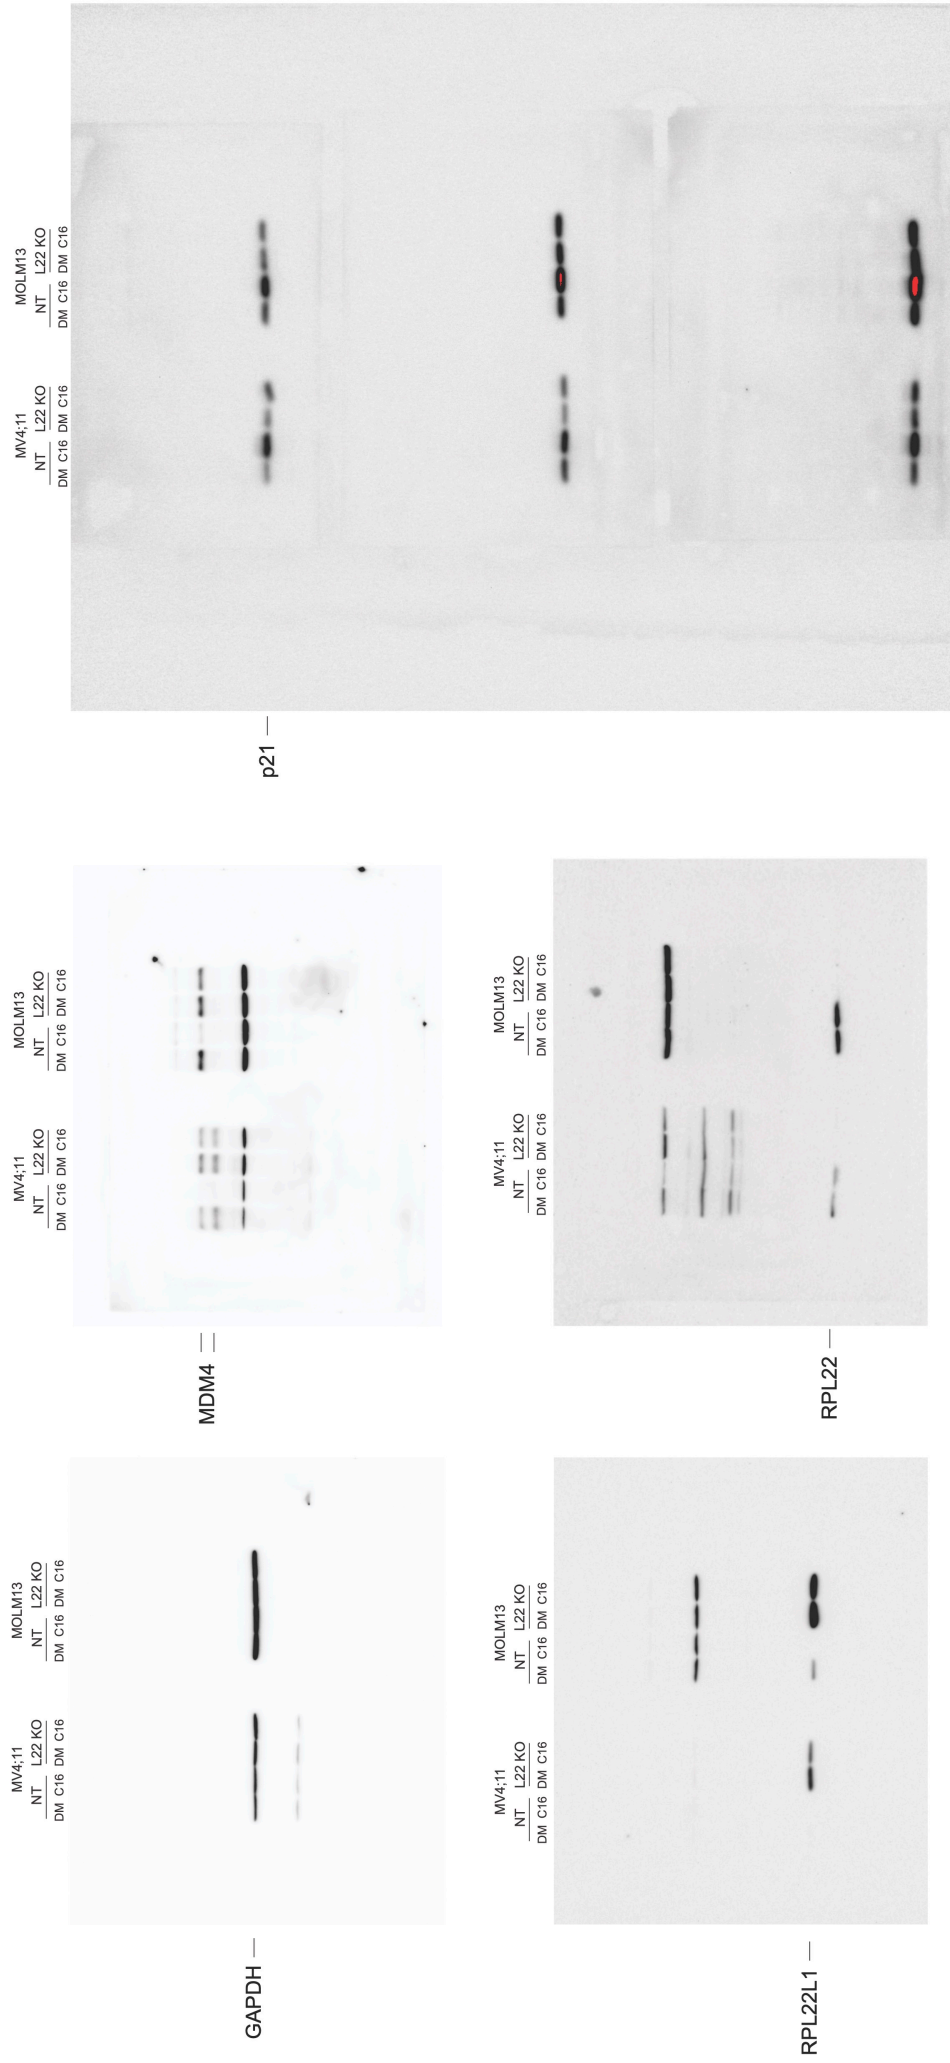

Supplement: media-22.pdf [file media-22.pdf]
